# Supplementary material
Source: ML conference proceedings conference paper supplement (https://proceedings.neurips.cc/paper_files/paper/2020/hash/f7a82ce7e16d9687e7cd9a9feb85d187-Abstract.html)
Supplement: Supplementary file [file f7a82ce7e16d9687e7cd9a9feb85d187-Supplemental.pdf]

The Appendix is organized as follows: Section A introduces notation and states some useful facts. Section B recounts basic tools from VC theory used to derive the results. Section C derives a framework for robust distribution estimation in  $\mathcal{F}$ -distance and proves Theorem 1. Building on this framework it then develops computationally efficient algorithms for learning in  $\mathcal{F}_k$  distance and proves Theorem 2. Section D gives the proof of the filtration properties and other results used in Section C. Section E gives the other remaining proofs of the main paper.

## A Preliminaries

We introduce terminology that helps describe the approach and results. Some of the work builds on results in [JO19], and we keep the notation consistent.

Recall that  $B$ ,  $B_G$ , and  $B_A$  are the collections of all-, good-, and adversarial-batches. Let  $B' \subseteq B$ ,  $B'_G \subseteq B_G$ , and  $B'_A \subseteq B_A$ , denote sub-collections of all-, good-, and bad-batches. We also let  $S$  denote a subset in the Borel  $\sigma$ -field  $\Sigma$  on domain  $\Omega$ .

Let  $X_1^b, X_2^b, \dots, X_n^b$  denote the  $n$  samples in a batch  $b$ , and let  $\mathbf{1}_S$  denote the indicator random variable for a subset  $S \in \Sigma$ . Every batch  $b \in B$  induces an empirical measure  $\bar{\mu}_b$  over the domain  $\Omega$ , where for each  $S \in \Sigma$ ,

$$\bar{\mu}_b(S) := \frac{1}{n} \sum_{i \in [n]} \mathbf{1}_S(X_i^b).$$

Similarly, any sub-collection  $B' \subseteq B$  of batches induces an empirical measure  $\bar{p}_{B'}$  defined by

$$\bar{p}_{B'}(S) := \frac{1}{|B'|n} \sum_{b \in B'} \sum_{i \in [n]} \mathbf{1}_S(X_i^b) = \frac{1}{|B'|} \sum_{b \in B'} \bar{\mu}_b(S).$$

We use two different symbols to denote empirical distribution defined by single batch and a sub-collection of batches to make them easily distinguishable. Note that  $\bar{p}_{B'}$  is the mean of the empirical measures  $\bar{\mu}_b$  defined by the batches  $b \in B'$ .

Recall that  $n$  is the batch size. For  $r \in [0, 1]$ , let  $\mathbf{V}(r) := \frac{r(1-r)}{n}$ , the variance of a Binomial( $r, n$ ) random variable. Observe that

$$\forall r, s \in [0, 1], \mathbf{V}(r) \leq \frac{1}{4n} \quad \text{and} \quad |\mathbf{V}(r) - \mathbf{V}(s)| \leq \frac{|r - s|}{n}, \quad (3)$$

where the second property follows as  $|r(1-r) - s(1-s)| = |r - s| \cdot |1 - (r + s)| \leq |r - s|$ .

For  $b \in B_G$ , the random variables  $\mathbf{1}_S(X_i^b)$  for  $i \in [n]$  are distributed i.i.d. Bernoulli( $p(S)$ ), and since  $\bar{\mu}_b(S)$  is their average,

$$E[\bar{\mu}_b(S)] = p(S) \quad \text{and} \quad \text{Var}[\bar{\mu}_b(S)] = E[(\bar{\mu}_b(S) - p(S))^2] = \mathbf{V}(p(S)).$$

For batch collection  $B' \subseteq B$  and subset  $S \in \Sigma$ , the empirical probability  $\bar{\mu}_b(S)$  of  $S$  will vary with the batch  $b \in B'$ . The *empirical variance* of these empirical probabilities is

$$\bar{\mathbf{V}}_{B'}(S) := \frac{1}{|B'|} \sum_{b \in B'} (\bar{\mu}_b(S) - \bar{p}_{B'}(S))^2.$$

## B Vapnik-Chervonenkis (VC) theory

We recall some basic concepts and results in VC theory, and derive some of their simple consequences that we use later in deriving our main results.

The *VC shatter coefficient* of  $\mathcal{F}$  is

$$S_{\mathcal{F}}(t) := \sup_{x_1, x_2, \dots, x_t \in \Omega} |\{\{x_1, x_2, \dots, x_t\} \cap S : S \in \mathcal{F}\}|,$$

the largest number of subsets of  $t$  elements in  $\Omega$  obtained by intersections with subsets in  $\mathcal{F}$ . The VC dimension of  $\mathcal{F}$  is

$$V_{\mathcal{F}} := \sup\{t : S_{\mathcal{F}}(t) = 2^t\},$$

the largest number of  $\Omega$  elements that are "fully shattered" by  $\mathcal{F}$ . The following Lemma [DL01] bounds the Shatter coefficient for a VC family of subsets.

**Lemma 10** ([DL01]). For all  $t \geq V_{\mathcal{F}}$ ,  $S_{\mathcal{F}}(t) \leq \left(\frac{te}{V_{\mathcal{F}}}\right)^{V_{\mathcal{F}}}$ .

Next we state the VC-inequality for relative deviation [VC74, AST93].

**Theorem 11.** Let  $p$  be a distribution over  $(\Omega, \Sigma)$ , and  $\mathcal{F}$  be a VC-family of subsets of  $\Omega$  and  $\bar{p}_t$  denote the empirical distribution from  $t$  i.i.d samples from  $p$ . Then for any  $\epsilon > 0$ , with probability  $\geq 1 - 8S_{\mathcal{F}}(2t)e^{-t\epsilon^2/4}$ ,

$$\sup_{S \in \mathcal{F}} \max \left\{ \frac{\bar{p}_t(S) - p(S)}{\sqrt{\bar{p}_t(S)}}, \frac{p(S) - \bar{p}_t(S)}{\sqrt{p(S)}} \right\} \leq \epsilon.$$

Another important ingredient commonly used in VC Theory is the concept of covering number that reflects the smallest number of subsets that approximate each subset in the collection.

Let  $p$  be any probability measure over  $(\Omega, \Sigma)$  and let  $\mathcal{F} \subseteq \Sigma$  be a family of subsets. A collection  $\mathcal{C} \subseteq \Sigma$  of subsets is an  $\epsilon$ -cover of  $\mathcal{F}$  under distribution  $p$  if for any  $S \in \mathcal{F}$ , there exists a  $S' \in \mathcal{C}$  with  $p(S \Delta S') \leq \epsilon$ . The  $\epsilon$ -covering number of  $\mathcal{F}$  is

$$N(\mathcal{F}, p, \epsilon) := \inf\{|\mathcal{C}| : \mathcal{C} \text{ is an } \epsilon\text{-cover of } \mathcal{F}\}.$$

If  $\mathcal{C} \subseteq \mathcal{F}$  is an  $\epsilon$ -cover of  $\mathcal{F}$ , then  $\mathcal{C}$  is an  $\epsilon$ -self cover of  $\mathcal{F}$ . The  $\epsilon$ -self-covering number of  $\mathcal{F}$  is

$$N^s(\mathcal{F}, p, \epsilon) := \inf\{|\mathcal{C}| : \mathcal{C} \text{ is an } \epsilon\text{-self-cover of } \mathcal{F}\}.$$

Clearly,  $N^s(\mathcal{F}, p, \epsilon) \geq N(\mathcal{F}, p, \epsilon)$ , and we establish the reverse relation.

**Lemma 12.** For any  $\epsilon \geq 0$ ,  $N^s(\mathcal{F}, p, \epsilon) \leq N(\mathcal{F}, p, \epsilon/2)$ .

*Proof.* If  $N(\mathcal{F}, p, \epsilon/2) = \infty$ , the lemma clearly holds. Otherwise, let  $\mathcal{C}$  be an  $\epsilon/2$ -cover of size  $N(\mathcal{F}, p, \epsilon/2)$ . We construct an  $\epsilon$ -self-cover of equal or smaller size.

For every subset  $S_C \in \mathcal{C}$ , there is a subset  $S = f(S_C) \in \mathcal{F}$  with  $p(S_C \Delta f(S_C)) \leq \epsilon/2$ . Otherwise,  $S_C$  could be removed from  $\mathcal{C}$  to obtain a strictly smaller  $\epsilon/2$  cover, which is impossible.

The collection  $\{f(S_C) : S_C \in \mathcal{C}\} \subseteq \mathcal{F}$  has size  $\leq |\mathcal{C}|$ , and it is an  $\epsilon$ -self-cover of  $\mathcal{F}$  because for any  $S \in \mathcal{F}$ , there is an  $S_C \in \mathcal{C}$  with  $p(S \Delta S_C) \leq \epsilon/2$ , and by the triangle inequality,  $p(S \Delta f(S_C)) \leq \epsilon$ . ■

Let  $N_{\mathcal{F}, \epsilon} := \sup_p N(\mathcal{F}, p, \epsilon)$  and  $N_{\mathcal{F}, \epsilon}^s := \sup_p N^s(\mathcal{F}, p, \epsilon)$  be the largest covering numbers under any distribution.

The next theorem bounds the covering number of  $\mathcal{F}$  in terms of its VC-dimension.

**Theorem 13** ([VW96]). There exists a universal constant  $c$  such that for any  $\epsilon > 0$ , and any family  $\mathcal{F}$  with VC dimension  $V_{\mathcal{F}}$ ,

$$N_{\mathcal{F}, \epsilon} \leq cV_{\mathcal{F}} \left(\frac{4e}{\epsilon}\right)^{V_{\mathcal{F}}}.$$

Combining the theorem and Lemma 12, we obtain the following corollary.

**Corollary 14.** There exists a universal constant  $c$  such that for any  $\epsilon > 0$ , and any family  $\mathcal{F}$  with VC dimension  $V_{\mathcal{F}}$ ,

$$N_{\mathcal{F}, \epsilon}^s \leq cV_{\mathcal{F}} \left(\frac{8e}{\epsilon}\right)^{V_{\mathcal{F}}}.$$

The above corollary implies that for any distribution  $p$ , a VC class  $\mathcal{F}$  has an  $\epsilon$  self cover, under distribution  $p$ , of size  $\mathcal{O}\left(V_{\mathcal{F}} \left(\frac{8e}{\epsilon}\right)^{V_{\mathcal{F}}}\right)$ .

## C A framework for distribution estimation from corrupted sample batches

We develop a general framework for learning distributions in  $\mathcal{F}$  distance, leading to Theorem 1. Building on this framework, we derive a computationally efficient algorithm for learning in  $\mathcal{F}_k$  distance, yielding Theorem 2.

Recall that the  $\mathcal{F}$  distance between two distributions  $p$  and  $q$  is

$$\|p - q\|_{\mathcal{F}} = \sup_{S \in \mathcal{F}} |p(S) - q(S)|.$$

Our goal is to estimate  $p$  to  $\mathcal{F}$ -distance  $\mathcal{O}(\Delta)$ , where  $\Delta = \mathcal{O}\left(\beta \sqrt{\frac{\ln(1/\beta)}{n}}\right)$  is essentially the lower bound.

At a high level, the filtering algorithm removes the adversarial, or "outlier" batches, and returns a sub-collection  $B' \subseteq B$  of batches whose empirical distribution  $\bar{p}_{B'}$  is close to  $p$  in  $\mathcal{F}$  distance. The uniform deviation inequality in VC theory states that the sub-collection  $B_G$  of good batches has empirical distribution  $\bar{p}_{B_G}$  that approximates  $p$  in  $\mathcal{F}$  distance, thereby ensuring the existence of such a sub-collection when the number of batches  $m$  is sufficiently large.

[JO19] developed a filtering algorithm for learning in TV-distance for a finite domain  $\Omega = [k]$ . The main drawback of this approach is that applying filtering algorithm directly for  $\Sigma$ -distance requires a number of samples linear in domain size, which is prohibitive for non-finite domains. Here we focus on general domains  $\Omega$  and any collection of its subsets that has a finite VC-dimension.

Subsection C.1 describes certain filtration properties for a subset of  $\Omega$  and using the subset that has these filtration properties as a filter. This can be viewed as a reinterpretation of the similar properties used in the filtering algorithm of [JO19]. Subsection C.2 uses these properties to develop a filtering algorithm for any finite collection of subsets. Subsection C.3 proves a Robust covering theorem to extend the filtering algorithm to VC family of subsets and proves Theorem 1. Subsection C.4 gives a computationally efficient filtering algorithm for the collection of subsets generated by a finite partition of the domain. Building on this, the next subsection C.5 gives an efficient algorithm for learning in  $\mathcal{F}_k$  distance and proves Theorem 2.

### C.1 Using subsets as filters

We discuss how a subset  $S \in \Sigma$  can be used as a filter. For this section, we fix a subset  $S \in \Sigma$ .

We show that if empirical estimates  $\bar{\mu}_b(S)$  that batches  $b \in B$  assigns to this subset  $S$  satisfy certain properties then we can accurately learn its probability and use this subset as a filter. The following discussion develops some notation and intuitions that lead to these properties.

We start with the following observation. For every good batch  $b \in B_G$ , the empirical estimate  $n \cdot \bar{\mu}_b(S)$  has a binomial distribution  $\text{Bin}(p(S), n)$ , which implies that  $\bar{\mu}_b(S)$  has a sub-gaussian distribution  $\text{subG}(p(S), \frac{1}{4n})$  with variance  $\mathbb{V}(p(S))$ . Hence, the empirical mean and variance of  $\bar{\mu}_b(S)$  over  $b \in B_G$  converges to the expected values  $p(S)$  and  $\mathbb{V}(p(S))$ , respectively. Moreover, sub-gaussian property of the distribution of  $\bar{\mu}_b(S)$  implies that, most of the good batches  $b \in B_G$  assign the empirical probability  $\bar{\mu}_b(S) \in p(S) \pm \tilde{O}(1/\sqrt{n})$ .

In addition to the good batches, the collection  $B$  of batches also includes an adversarial sub-collection  $B_A$  of batches that constitute up to a  $\beta$ -fraction of  $B$ . If the difference between  $p(S)$  and the average of  $\bar{\mu}_b(S)$  over all adversarial batches  $b \in B_A$  is  $\leq \tilde{O}(\frac{1}{\sqrt{n}})$ , namely comparable to the standard deviation of  $\bar{\mu}_b(S)$  for the good batches  $b \in B_G$ , then the adversarial batches can change the overall mean of empirical probabilities  $\bar{\mu}_b(S)$  by at most  $\tilde{O}(\frac{\beta}{\sqrt{n}})$ , which is within our tolerance. Hence, the mean of  $\bar{\mu}_b(S)$  will deviate significantly from  $p(S)$  only in the presence of a large number of adversarial batches  $b \in B_A$  whose empirical probability  $\bar{\mu}_b(S)$  differs from  $p(S)$  by  $\gg \tilde{\Omega}(\frac{1}{\sqrt{n}})$ .

To quantify this effect, for a subset  $S \in \Sigma$ , let

$$\text{med}(\bar{\mu}(S)) := \text{median}\{\bar{\mu}_b(S) : b \in B\}$$

be the median empirical probability of  $S$  over all batches. Property 1 (defined later) shows that w.h.p., the absolute difference between  $\text{med}(\bar{\mu}(S))$  and  $p(S)$  is  $\leq \mathcal{O}(1/\sqrt{n})$ . The *corruption score* of batch  $b$  for  $S$  is

$$\psi_b(S) := \begin{cases} 0 & \text{if } |\bar{\mu}_b(S) - \text{med}(\bar{\mu}(S))| \leq \mathcal{O}\left(\sqrt{\frac{\ln(1/\beta)}{n}}\right), \\ (\bar{\mu}_b(S) - \text{med}(\bar{\mu}(S)))^2 & \text{otherwise.} \end{cases}$$

The preceding discussion shows that the corruption score of most good batches for the subset  $S$  is zero and that adversarial batches that may significantly change the overall mean of empirical probabilities have high corruption score.

The *corruption score* of a sub-collection  $B' \subseteq B$  for a subset  $S$  is the sum of the *corruption score* of its batches,

$$\psi_{B'}(S) := \sum_{b \in B'} \psi_b(S).$$

A high corruption score of  $B'$  for a subset  $S$  indicates that  $B'$  has many batches  $b$  with large difference  $|\bar{\mu}_b(S) - \text{med}(\bar{\mu}(S))|$ .

Next, we describe some essential properties that allows to a use subset  $S$  as a filter. We later show that regardless of the samples in adversarial batches, with high probability, the empirical estimates  $\bar{\mu}_b(S)$  for  $b \in B$  satisfies the following four *filtration properties*.

1. The median of the estimates  $\{\bar{\mu}_b(S) : b \in B\}$  is close to  $p(S)$ ,

$$|\text{med}(\bar{\mu}(S)) - p(S)| \leq \mathcal{O}(1/\sqrt{n}).$$

2. For every sub-collection  $B'_G \subseteq B_G$  containing a large portion of the good batches,  $|B'_G| \geq (1 - \beta/6)|B_G|$ , the empirical mean of  $\bar{\mu}_b(S)$  estimate  $p(S)$  well,

$$|\bar{p}_{B'_G}(S) - p(S)| \leq \mathcal{O}\left(\beta \sqrt{\frac{\ln(1/\beta)}{n}}\right) = \mathcal{O}(\Delta),$$

3. The corruption score of the collection  $B_G$  of good batches for subset  $S$  is small,

$$\psi_{B'}(S) \leq \kappa_G := \mathcal{O}\left(\frac{\beta m \ln(1/\beta)}{n}\right).$$

4. For every sub-collection  $B'_G \subseteq B_G$  s.t.  $|B'_G| \geq (1 - \beta/6)|B_G|$ , the empirical variance of  $\bar{\mu}_b(S)$  estimate  $\mathbb{V}(p(S))$  well,

$$\left| \frac{1}{|B'_G|} \sum_{b \in B'_G} (\bar{\mu}_b(S) - p(S))^2 - \mathbb{V}(p(S)) \right| \leq \mathcal{O}\left(\frac{\beta \ln(1/\beta)}{n}\right).$$

If any of the four filtration properties holds for subset  $S$ , we say that  $S$  has that particular property.

Next we show how a subset  $S$  with the first three of the filtration properties, can be used as a filter. The last filtration property will be used later for deriving computationally efficient algorithms.

For subset  $S$  that has filtration properties and for every sub-collection  $B' \subseteq B$  that contain most good batches, the next lemma upper bounds the absolute difference between  $p(S)$  and the empirical estimate  $\bar{p}_{B'}(S)$  of the batches in  $B'$  in terms of the corruption score of  $B'$ .

**Lemma 15.** *If subset  $S$  has filtration properties 1- 3, then for any  $B'$  such that  $|B' \cap B_G| \geq (1 - \frac{\beta}{6})|B_G|$  such that  $\psi_{B'}(S) \leq t \cdot \kappa_G$ , for some  $t \geq 0$ , then*

$$|\bar{p}_{B'}(S) - p(S)| \leq \mathcal{O}\left((\sqrt{t} + 1)\Delta\right).$$

The lemma is related to Lemma 4 in [JO19], hence we provide only a high-level argument. For any sub-collection  $B'$  retaining a major portion of good batches, from filtration property 2, the mean of  $\bar{\mu}_b(S)$  of the good batches  $B' \cap B_G$  approximates  $p(S)$ . Showing that a small corruption score of  $B'$  implies that the adversarial batches  $B' \cap B_A$  have limited effect on  $\bar{p}_{B'}(S)$  proves the lemma.

Next, we describe the *Batch-Deletion* algorithm of [JO19] and its performance guarantees.

Given a subset  $S$  with filtration property 3 and any sub-collection  $B'$ , the algorithm successively removes batches from  $B'$ , ensuring that each batch removed is adversarial with high probability. The algorithm stops deleting batches when the corruption score of the remaining sub-collection for  $S$  is small.

---

**Algorithm 1** Batch-Deletion

---

- 1: **Input:** Sub-Collection  $B'$  of Batches, subset  $S$ ,  $\text{med}=\text{med}(\bar{\mu}(S))$ , and  $\kappa_G$
  - 2: **Output:** A smaller sub-collection  $B'$  of batches
  - 3: **Comment:** The terms  $\kappa_G$ ,  $\psi_b(S)$ , and  $\psi_{B'}(S)$  used below are defined earlier in this section, and computing  $\psi_b(S)$  and  $\psi_{B'}(S)$  require  $\text{med}(\bar{\mu}(S))$  as input (that depends on all batches  $B$ ).
  - 4: **while**  $\psi_{B'}(S) \geq 20\kappa_G$  **do**
  - 5:     Select a single batch  $b \in B'$  where batch  $b$  is selected with probability  $\frac{\psi_b(S)}{\psi_{B'}(S)}$ ;
  - 6:      $B' \leftarrow \{B' \setminus b\}$ ;
  - 7: **end while**
  - 8: **return** ( $B'$ );
- 

The next lemma, characterizes the performance of the Batch-Deletion algorithm.

**Lemma 16.** *Let  $B' \subseteq B$  and subset  $S$  be the input of the Batch-Deletion algorithm. If subset  $S$  has filtration property 3, then:*

1. *Each batch that gets removed from  $B'$  by Batch-Deletion algorithm is an adversarial batch with probability  $\geq 0.95$ .*
2. *Batch-Deletion returns updated sub-collection  $B'$  such that  $\psi_{B'}(S) < 20\kappa_G$ .*

*Proof.* The first statement in the lemma follows as

$$\Pr[\text{Deleting a batch from } B_G \cap B'] = \sum_{b \in B' \cap B_G} \frac{\psi_b(S)}{\psi_{B'}(S)} \leq \frac{\sum_{b \in B_G} \psi_b(S)}{\psi_{B'}(S)} \leq \frac{\kappa_G}{20\kappa_G} \leq 0.05,$$

here we used filtration property 3. The second statement in the Lemma follows from step 4 of Batch-Deletion algorithm. ■

Lemma 15 implies that if a sub-collection  $B'$  has most of the good batches and has a small corruption score for subset  $S$ , then  $\bar{\mu}_b(S)$  is close to  $p(S)$ .

Lemma 16 implies that if sub-collection  $B'$  has large corruption for subset  $S$ , then there is a probabilistic method that removes more adversarial batches from  $B'$  then good batches and lowers the corruption.

The next subsection builds on these two Lemma and gives a simple filtering algorithm for any finite collection of subsets  $C \subseteq \Sigma$  whose subsets  $S \in C$  has filtration properties 1-3.

## C.2 Filtering algorithms for finite collection of subsets

Given any finite collection of subsets  $C \subseteq \mathcal{F}'$ , algorithm 2, described next, uses the Batch-Deletion algorithm to successively update  $B$  and decrease the corruption score for each subset  $S \in C$ .

---

**Algorithm 2** Filtering Algorithm

---

- 1: **Input:** Collection  $B$  of Batches, finite subset family  $C \subseteq \Sigma$ , adversarial batches fraction  $\beta$
  - 2: **Output:** A sub-collection  $B^*$  of batches.
  - 3: **Comment:** The terms  $\kappa_G$ ,  $\psi_{B'}(S)$ , and  $\text{med}(\bar{\mu}(S))$  used below are defined earlier in this section
  - 4:  $B' = B$ ;
  - 5: **for**  $S \in C$  **do**
  - 6:     **if**  $\psi_{B'}(S) \geq 20\kappa_G$  **then**
  - 7:          $\text{med} \leftarrow \text{med}(\bar{\mu}(S))$ ;
  - 8:          $B' \leftarrow \text{Batch-Deletion}(B', S, \text{med})$ ;
  - 9:     **end if**
  - 10: **end for**
  - 11:  $B^* \leftarrow B'$
  - 12: **return** ( $B^*$ );
-

The next lemma characterizes the algorithm's performance.

**Lemma 17.** *Let  $C \subseteq \Sigma$  be a finite collection of subsets. If all subsets in  $C$  have filtration properties 1, 2 and 3, then algorithm 2 returns a sub-collection of batches  $B^*$  such that with probability  $\geq 1 - e^{-O(\beta m)}$ ,  $|B^* \cap B_G| \geq (1 - \frac{\beta}{6})|B_G|$  and*

$$\|p - p_{B^*}\|_C = \max_{S \in C} |p(S) - p_{B^*}(S)| \leq \mathcal{O}(\Delta).$$

The proof of the lemma is immediate from Lemmas 15 and 16.

We note that  $|B^*| \geq (1 - \frac{\beta}{6})|B_G| \geq (1 - \frac{\beta}{6})(1 - \beta)m > m/2$ , as  $\beta \in (0, 0.4]$ . Therefore, w.h.p.  $B^*$  retains at least half of the overall batches.

### C.3 Robust covering theorem for learning in $\mathcal{F}$ distance and Proof of Theorem 1

A subset family  $\mathcal{F}$ , with finite VC dimension, can have potentially uncountable subsets, hence, even if all subsets in  $\mathcal{F}$  have filtration properties 1-3, we may not be able to use filtering algorithm directly for subset family  $\mathcal{F}$ . The *Robust covering* theorem proved here overcomes this challenge.

Recall that the collection  $B$  includes adversarial batches that can cause the empirical distribution of all batches  $\bar{p}_B$  to be at an  $\mathcal{F}$ -distance  $\mathcal{O}(\beta)$  from  $p$ .

Yet for any  $\epsilon > 0$ , any sub-collection  $B' \subseteq B$  consisting of at least half of the batches, and for any  $\epsilon$ -cover  $\mathcal{C}$  of  $\mathcal{F}$  under the empirical distribution  $\bar{p}_B$  of all batches  $B$ , the next theorem upper bounds,  $\|\bar{p}_{B'} - p\|_{\mathcal{F}}$ , the  $\mathcal{F}$ -distance between  $p$  and the empirical distribution induced by  $B'$  in terms of  $\|\bar{p}_{B'} - p\|_C$ , the  $\mathcal{C}$ -distance between them.

Let  $\mathcal{G}$  be a VC-class of subsets such that  $\mathcal{F} \subseteq \mathcal{G}$ . The theorem allows the  $\epsilon$ -cover  $\mathcal{C}$  of  $\mathcal{F}$  to include subsets from a larger class of subsets  $\mathcal{G}$ . Although, one can always choose a cover of  $\mathcal{F}$  from within the class, as we will see in later subsections, for computationally efficient algorithms some additional structure in the cover may be desired. And to choose such a cover, we will choose its elements (subsets) from a larger class of subsets than  $\mathcal{F}$ .

**Theorem 18 (Robust covering).** *For any  $\epsilon > 0$ , any subset family  $\mathcal{G} \supseteq \mathcal{F}$  with VC dimension  $V_G$ , and  $m \cdot n \geq \mathcal{O}(\frac{V_G \log(1/\epsilon) + \log(1/\delta)}{\epsilon^2})$ , let  $\mathcal{C} \subseteq \mathcal{G}$  be an  $\epsilon$ -cover of family  $\mathcal{F}$  under the empirical distribution  $\bar{p}_B$ . With probability  $\geq 1 - \delta$ , for every sub-collection of batches  $B' \subseteq B$  of size  $|B'| \geq m/2$ ,*

$$\|\bar{p}_{B'} - p\|_{\mathcal{F}} \leq \|\bar{p}_{B'} - p\|_C + 5\epsilon.$$

*Proof.* Consider any batch sub-collection  $B' \subseteq B$ . For every  $S, S' \in \Sigma$ , by the triangle inequality,

$$\begin{aligned} |\bar{p}_{B'}(S) - p(S)| &= \left| \left( \bar{p}_{B'}(S') + \bar{p}_{B'}(S \setminus S') - \bar{p}_{B'}(S' \setminus S) \right) - \left( p(S') + p(S \setminus S') - p(S' \setminus S) \right) \right| \\ &\leq |\bar{p}_{B'}(S') - p(S')| + \bar{p}_{B'}(S \setminus S') + \bar{p}_{B'}(S' \setminus S) + p(S \setminus S') + p(S' \setminus S) \\ &= |\bar{p}_{B'}(S') - p(S')| + \bar{p}_{B'}(S \Delta S') + p(S \Delta S'). \end{aligned} \quad (4)$$

Since  $\mathcal{C}$  is an  $\epsilon$ -cover under  $\bar{p}_B$ , for every  $S \in \mathcal{F}$  there is an  $S' \in \mathcal{C}$  such that  $\bar{p}_B(S \Delta S') \leq \epsilon$ . For such pairs, we bound the second term on the right in the above equation.

$$\begin{aligned} \bar{p}_{B'}(S \Delta S') &= \frac{1}{|B'|n} \sum_{b \in B'} \sum_{i \in [n]} \mathbf{1}_{S \Delta S'}(X_i^b) \\ &\leq \frac{1}{|B'|n} \sum_{b \in B} \sum_{i \in [n]} \mathbf{1}_{S \Delta S'}(X_i^b) \\ &= \frac{|B|}{|B'|} \cdot \frac{1}{|B|n} \sum_{b \in B} \sum_{i \in [n]} \mathbf{1}_{S \Delta S'}(X_i^b) \\ &= \frac{m}{|B'|} \bar{p}_B(S \Delta S') \leq \frac{m\epsilon}{|B'|}. \end{aligned} \quad (5)$$

Choosing  $B' = B_G$  in the above equation and using  $B_G = (1 - \beta)m \geq m/2$  gives,

$$\bar{p}_{B_G}(S \Delta S') < 2\epsilon. \quad (6)$$

Then

$$\begin{aligned}
p(S\Delta S') &\leq |p(S\Delta S') - \bar{p}_{B_G}(S\Delta S')| + \bar{p}_{B_G}(S\Delta S') \\
&\stackrel{(a)}{\leq} \sup_{S, S' \in \mathcal{G}} |p(S\Delta S') - \bar{p}_{B_G}(S\Delta S')| + 2\epsilon \\
&\stackrel{(b)}{\leq} \epsilon + 2\epsilon,
\end{aligned}$$

with probability  $\geq 1 - \delta$ , here (a) used the fact that  $\mathcal{C}, \mathcal{F} \subseteq \mathcal{G}$  and equation (6) and (b) follows from Lemma 24. Combining equations (4), (5) and the above equation completes the proof.  $\blacksquare$

In contrast to the class  $\mathcal{F}$ , which could be infinite, we can always choose a cover  $\mathcal{C}$  of finite size and therefore run filtering algorithm 2 for  $C = \mathcal{C}$  to learn in  $\mathcal{C}$  distance. Robust covering theorem implies that if  $\mathcal{C}$  is  $\epsilon$ -cover of family  $\mathcal{F}$ , under distribution  $\bar{p}_B$ , where  $\epsilon = \mathcal{O}(\Delta)$ , then for learning in  $\mathcal{C}$  distance suffices to learn in  $\mathcal{F}$  distance.

The only step that remains is to find a cover whose subsets have filtration properties. The next lemma establishes that every subsets in a given VC-subset family  $\mathcal{G}$  has filtration properties.

**Lemma 19.** *For any given subset family  $\mathcal{G}$  with finite VC dimension and the number of batches  $m \geq \mathcal{O}\left(\frac{V_{\mathcal{G}} \log(n/\beta) + \log(1/\delta)}{\beta^2}\right)$ . With probability  $\geq 1 - \delta$ , all subsets in  $\mathcal{G}$  has filtration properties 1-4.*

The proof of the lemma appears in section D.

Note that the number of samples required in the lemma increase with the VC-complexity of  $\mathcal{G}$ . Therefore, to obtain sample optimal algorithm, we choose  $\mathcal{G} = \mathcal{F}$ , and  $\mathcal{C}$  to be any finite  $\epsilon$ -self-cover of  $\mathcal{F}$  under distribution  $\bar{p}_B$ , where  $\epsilon \leq \mathcal{O}(\Delta)$ . The existence of such a self-cover is guaranteed by Corollary 14.

The above lemma implies that w.h.p. all subsets in  $\mathcal{C}$  has filtration property. Therefore, we run algorithm 2 for  $C = \mathcal{C}$ . Then combining Lemma 17 and robust covering theorem 18 implies learning in  $\mathcal{F}$  distance and gives Theorem 1.

**Theorem 20** (Theorem 1 restated). *For any  $\beta \leq 0.4$ ,  $\delta > 0$ ,  $\mathcal{F}$ , and  $m \cdot n \geq \mathcal{O}\left(\frac{V_{\mathcal{F}} \log(1/\Delta) + \log 1/\delta}{\Delta^2} \cdot \log\left(\frac{1}{\beta}\right)\right)$ , there is a non-constructive algorithm that with probability  $\geq 1 - \delta$  returns a sub-collection of batches  $B^*$  such that  $|B^* \cap B_G| \geq (1 - \frac{\beta}{6})|B_G|$  and  $\|p - \bar{p}_{B^*}\|_{\mathcal{F}} \leq \mathcal{O}(\Delta)$ .*

#### C.4 Computationally efficient algorithm for subsets generated by a partition

For estimating  $p$  in  $\mathcal{F}$ -distance, in the previous subsection, we chose  $\mathcal{C}$  to be a cover of  $\mathcal{F}$  and estimated  $p$  in  $\mathcal{C}$  distance. Then to estimate  $p$  in  $\mathcal{C}$  distance, algorithm 2 iterates through all subsets in  $\mathcal{C}$  one by one, and therefore, has run-time at least linear in the size of the subset family  $\mathcal{C}$ . But the size of the cover of  $\mathcal{F}$  may grow exponentially with the VC-dimension of family  $\mathcal{F}$ . This makes the algorithm 2 computationally prohibitive even for subset family  $\mathcal{F}$  with moderate VC-dimension. Here we show that if subset collection  $\mathcal{C}$  has a certain structure then this time complexity can be reduced significantly.

For any  $\ell > 0$ , we consider  $\mathcal{C}$  which is the collection of all subsets generated by an  $\ell$ -partition of the domain  $\Omega$ . Here we give a filtering algorithm that has run time only polynomial in  $\ell$ , whereas the size of subset collection  $\mathcal{C}$  is  $2^\ell$ .

For any integer  $\ell > 0$ , let  $\xi : \Omega \rightarrow [\ell]$  be any function. This function  $\xi$  partitions the domain  $\Omega$  into  $\ell$  disjoint parts. For  $j \in [\ell]$ , let  $\xi_j := \xi^{-1}(j)$  denote the  $j^{\text{th}}$  partition element in the partition created by  $\xi$ . Clearly the partition elements  $\xi_j$ 's are disjoint and their union is  $\Omega$ . We refer to  $\xi$  as *partition function*. Note that a partition function  $\xi$  is uniquely determined by the corresponding partition elements  $\xi_j$ 's.

For a subset  $D \subseteq [\ell]$ , let

$$S_D^\xi := \cup_{j \in D} \xi_j,$$

be the union of the partition elements  $\xi_j$ 's corresponding to the elements of  $D$ . Define the collection of subsets

$$\mathcal{C}^\xi := \{S_D^\xi : D \in 2^{[\ell]}\}$$

to be the family of all possible unions of  $\xi_j$ 's. Clearly,  $|C^\xi| = 2^\ell$ .

We show that if all subsets  $S \in C^\xi$  have filtration properties 1-4, then  $p$  can be estimated to a small  $C^\xi$ -distance in time polynomial in  $\ell$  rather than exponential.

For finite domain  $\Omega' = [\ell]$ , [JO19] derived a method that for any batch sub-collection  $B'$ , containing a majority of good batches, can find a subset in  $2^{[\ell]}$  for which the corruption score of  $B'$  is within a constant times the maximum in time only polynomial in the domain size  $\ell$ , when all subsets in  $2^{[\ell]}$  have filtration properties 1-4. Then instead of iterating over all  $2^\ell$  subsets, as in algorithm 2, they find the subsets with high corruption score efficiently and use the Batch Deletion procedure for these subsets. This leads to a computationally efficient algorithm for learning discrete distributions  $p$ .

To obtain a computationally efficient algorithm for learning in  $C^\xi$  distance, we first reduce this problem to that of robustly learning distributions over finite domains in total variation distance and then use the algorithm in [JO19].

**Theorem 21.** *Let  $\xi : \Omega \rightarrow [\ell]$  be any partition function and let  $C^\xi$  be the collection of all possible unions of the partition elements  $\xi_j$ 's. If all subsets in  $C^\xi$  have filtration properties 1-4, then there is an algorithm that runs in time polynomial in all parameters  $\ell$ ,  $m$ , and  $n$ , and with probability  $\geq 1 - e^{-O(\beta m)}$  returns a sub-collection of batches  $B^* \subseteq B$  such that  $|B^* \cap B_G| \geq (1 - \beta/6)|B_G|$  and*

$$\|p - \bar{p}_{B^*}\|_{C^\xi} \leq \mathcal{O}(\Delta).$$

*Proof.* First note that  $\xi$  transforms any distribution  $q$  over  $\Omega$  to the discrete distribution  $q^\xi$  over  $\Omega' = [\ell]$ , where  $q^\xi(j) := q(\xi_j)$  for each  $j \in [\ell]$ . Recall that any subset  $D \subseteq [\ell]$ , corresponds one to one with a subset  $S_D^\xi = \cup_{j \in D} \xi_j$  in  $C^\xi$ . It follows that for any distribution  $q$  over  $\Omega$ , and  $D \subseteq [\ell]$ ,

$$q(S_D^\xi) = q^\xi(D).$$

Recall that  $\bar{p}_{B'}$  denotes the empirical distribution induced by a sub-collection  $B'$ , therefore  $\bar{p}_{B'}^\xi$  denotes the empirical distribution induced by a sub-collection  $B'$  over the transformed domain  $[\ell]$ .

From the one-to-one correspondence between subsets in  $C^\xi$  and subsets in  $2^{[\ell]}$  it follows that all subsets in  $C^\xi$  have filtration properties iff all subsets in  $2^{[\ell]}$  have filtration properties for the transformed distributions  $p^\xi$  and transformed empirical distribution of the sample batches.

Theorem 9 in [JO19] implies that, if all subsets in  $2^{[\ell]}$  have filtration properties 1-4 then algorithm 2 therein runs in time polynomial in the domain size  $\ell$ , the number of batches  $m$ , and the batch-size  $n$ , and with probability  $\geq 1 - e^{-O(\beta m)}$  returns a sub-collection of batches  $B^* \subseteq B$  such that  $|B^* \cap B_G| \geq (1 - \beta/6)|B_G|$  and

$$\|p^\xi - \bar{p}_{B^*}^\xi\|_{TV} \leq \mathcal{O}(\Delta).$$

Next, for any pair of distributions  $q_1$  and  $q_2$  over the domain  $\Omega$ , we show that  $C^\xi$ -distance between them is the same as the total variation distance between  $q_1^\xi$  and  $q_2^\xi$ . For every distribution pair  $q_1, q_2$  over  $\Omega$ ,

$$\begin{aligned} \|q_1 - q_2\|_{C^\xi} &= \max_{S \in C^\xi} |q_1(S) - q_2(S)| \\ &= \max_{S_D^\xi \in C^\xi} |q_1(S_D^\xi) - q_2(S_D^\xi)| \\ &= \max_{D \in 2^{[\ell]}} |q_1^\xi(D) - q_2^\xi(D)| \\ &= \|q_1^\xi - q_2^\xi\|_{TV}. \end{aligned}$$

Therefore,

$$\|p - \bar{p}_{B^*}\|_{C^\xi} = \|p^\xi - \bar{p}_{B^*}^\xi\|_{TV} \leq \mathcal{O}(\Delta). \quad \blacksquare$$

## C.5 Computationally efficient algorithm for learning in $\mathcal{F}_k$ distance and proof of Theorem 2

Recall that  $\mathcal{F}_k$  is the collection of all unions of at most  $k$  intervals over  $\mathbb{R}$ .



In the previous subsection we showed that for a partition function  $\xi$ , we can learn in  $C^\xi$ -distance efficiently. To obtain a computationally efficient algorithm for learning in  $\mathcal{F}_k$  distance, we give a partition function  $\xi^* : \mathbb{R} \rightarrow [\ell]$ , for an appropriate  $\ell$  to be chosen later, such that the collection of subsets  $C^{\xi^*}$  forms an  $\epsilon$ -cover of  $\mathcal{F}_k$  under the empirical distribution  $\bar{p}_B$ .

Recall that  $B$  is a collection of  $m$  batches and each batch has  $n$  samples. Let  $s = n \cdot m$  and let  $x^s = x_1, x_2, \dots, x_s \in \mathbb{R}$  be the samples of  $B$  arranged in non-decreasing order. And recall that the points  $x^s$  induce an empirical measure  $\bar{p}_B$  over  $\mathbb{R}$ , where for  $S \subseteq \mathbb{R}$ ,

$$\bar{p}_B(S) = |\{i : x_i \in S\}|/s.$$

Let  $t := \frac{s}{\ell}$ , and for simplicity assume that it is an integer. Recall that a partition function  $\xi$  is uniquely determined by the corresponding partition elements  $\xi_j$ 's. Let  $\xi^* : \mathbb{R} \rightarrow [\ell]$  be the partition function with partition elements  $\{\xi_1^*, \dots, \xi_\ell^*\}$  of  $\mathbb{R}$ , where

$$\xi_j^* := \begin{cases} (-\infty, x_t] & j = 1, \\ (x_{(j-1)t}, x_{jt}] & 2 \leq j < \ell, \\ (x_{s-t}, \infty) & j = \ell. \end{cases}$$

Note that all elements of the partition  $\{\xi_1^*, \dots, \xi_\ell^*\}$  are intervals of  $\mathbb{R}$ . Recall that  $C^{\xi^*}$  is formed by all possible unions of these  $\ell$  intervals. Clearly  $C^{\xi^*} \subseteq \mathcal{F}_\ell$ , as  $\mathcal{F}_\ell$  contains all unions of  $\ell$  intervals over  $\mathbb{R}$ .

We show that  $C^{\xi^*}$  is an  $2k/\ell$ -cover of  $\mathcal{F}_k$  under the empirical distribution  $\bar{p}_B$  of points  $x_1^s$ .

**Lemma 22.** *For any  $k$ , and  $\ell$ ,  $C^{\xi^*}$  is a  $\frac{2k}{\ell}$ -cover of  $\mathcal{F}_k$  under  $\bar{p}_B$ .*

*Proof.* Any set  $S \in \mathcal{F}_k$  is a union of  $k$  real intervals  $I_1 \cup I_2 \cup \dots \cup I_k$ . Let  $S^* \subseteq \mathbb{R}$  be the union of all  $\xi_j^*$ -partition elements (intervals) that are fully contained in one of the intervals  $I_1, \dots, I_k$ . By definition,  $S^* \in C^{\xi^*}$ , and we show that  $\bar{p}_B(S \Delta S^*) \leq 2k/\ell$ . By construction,  $S^* \subseteq S$ , hence,

$$\bar{p}_B(S \Delta S^*) = \bar{p}_B(S \setminus S^*) = \sum_{j=1}^k \bar{p}_B(I_j \setminus S^*) = \sum_{j=1}^k \frac{|\{x_i \in I_j \setminus S^*\}|}{s} \leq \sum_{j=1}^k 2 \cdot \frac{t}{s} = \frac{2k}{\ell},$$

where the inequality follows as each  $I_j \setminus S^*$  contains at most  $t$  points and the left and right.  $\blacksquare$

Next choose  $\ell = \frac{2k}{\epsilon}$  then the lemma implies that the corresponding  $C^{\xi^*}$  is an  $\epsilon$ -cover of  $\mathcal{F}_k$  under  $\bar{p}_B$ . As discussed earlier  $C^{\xi^*} \subseteq \mathcal{F}_\ell$ . Then choosing  $\mathcal{G} = \mathcal{F}_\ell$  in Lemma 19 implies that *w.h.p.* all subsets in  $C^{\xi^*}$  has filtering properties. Then combining Theorem 21 and robust covering theorem 18, and choosing  $\epsilon = \mathcal{O}(\Delta)$ , we get the following theorem that implies learning in  $\mathcal{F}_k$  distance.

We note that this computationally efficient algorithm uses  $\mathcal{O}(1/\Delta)$  times more sample than information theoretic algorithm in section C.3, because here we chose the cover of  $\mathcal{F}_k$  from the class  $\mathcal{G} = \mathcal{F}_{k/\Delta}$ . And  $\mathcal{F}_{k/\Delta}$  has VC dimension  $\mathcal{O}(k/\Delta)$ , which is  $\mathcal{O}(1/\Delta)$  times the VC-dimension of the class  $\mathcal{F}_k$ .

**Theorem 23** (Theorem 2 restated). *For any given  $\beta \leq 0.4$ ,  $\delta > 0$ ,  $k > 0$ , and  $m \cdot n \geq \mathcal{O}\left(\frac{k \log(1/\Delta) + \log 1/\delta}{\Delta^3} \cdot \log\left(\frac{1}{\beta}\right)\right)$ , there is an algorithm that runs in time polynomial in all parameters, and with probability  $\geq 1 - \delta$  returns a sub-collection of batches  $B^*$  such that  $|B^* \cap B_G| \geq (1 - \frac{\beta}{6})|B_G|$  and*

$$\|\bar{p}_{B^*} - p\|_{\mathcal{F}_k} \leq \mathcal{O}(\Delta).$$

## D Properties of the Collection of Good Batches

**Lemma 24.** *Let  $\mathcal{G}$  be a VC family of subsets of  $\Omega$ . Then for any  $\delta > 0$  and  $|B_G| \cdot n \geq \mathcal{O}\left(\frac{V_{\mathcal{G}} \log(1/\epsilon) + \log(1/\delta)}{\epsilon^2}\right)$ , with probability  $\geq 1 - \delta$ ,*

$$\sup_{S, S' \in \mathcal{G}} \max \left\{ \frac{\bar{p}_{B_G}(S \Delta S') - p(S \Delta S')}{\sqrt{\bar{p}_{B_G}(S \Delta S')}}}, \frac{p(S \Delta S') - \bar{p}_{B_G}(S \Delta S')}{\sqrt{p(S \Delta S')}}} \right\} \leq \epsilon.$$

*Proof.* Consider the collection of symmetric differences of subsets in  $\mathcal{G}$ ,

$$\mathcal{G}_\Delta := \{S \Delta S' : S, S' \in \mathcal{G}\}.$$

The next auxiliary lemma bounds the shatter coefficient of  $\mathcal{G}_\Delta$ .

**Lemma 25.** For  $t \geq V_{\mathcal{G}}$ ,  $S_{\mathcal{G}_\Delta}(t) \leq \left(\frac{te}{V_{\mathcal{G}}}\right)^{2V_{\mathcal{G}}}$ .

*Proof.* For  $t \geq V_{\mathcal{G}}$  and  $x_1, x_2, \dots, x_t \in \Omega$ , let

$$\mathcal{G}(x_1^t) = \{\{x_1, x_2, \dots, x_t\} \cap S : S \in \mathcal{G}\}.$$

Note that  $S_{\mathcal{G}}(t) = \max_{x_1, \dots, x_t} |\mathcal{G}(x_1^t)|$ .

From the definition of shatter coefficient  $|\mathcal{G}(x_1^t)| \leq S_{\mathcal{G}}(t)$ . Then

$$|\mathcal{G}_\Delta(x_1^t)| = |\{\{x_1, \dots, x_t\} \Delta \{x'_1, \dots, x'_t\} : S, S' \in \mathcal{G}(x_1^t)\}| \leq (S_{\mathcal{G}}(t))^2 \leq \left(\frac{te}{V_{\mathcal{G}}}\right)^{2V_{\mathcal{G}}}. \quad \blacksquare$$

Applying Theorem 11 for family of subsets  $\mathcal{G}_\Delta$ , and using Lemma 25, for  $|B_G| \cdot n \geq \mathcal{O}\left(\frac{V_{\mathcal{G}} \log(1/\epsilon) + \log(1/\delta)}{\epsilon^2}\right)$ , with probability  $\geq 1 - \delta$ ,

$$\sup_{S \in \mathcal{G}_\Delta} \max \left\{ \frac{\bar{p}_{B_G}(S) - p(S)}{\sqrt{\bar{p}_{B_G}(S)}}, \sup_{S \in \mathcal{G}} \frac{p(S) - \bar{p}_{B_G}(S)}{\sqrt{p(S)}} \right\} \leq \epsilon. \quad \blacksquare$$

### D.1 Proof of Lemma 19

First we list some auxiliary properties for a subset  $S$ , each of which is either one of the filtration property or helps in deriving one of the filtration property.

(i) For every  $B'_G \subseteq B_G$ , such that  $|B'_G| \geq (1 - \beta/6)|B_G|$

$$|\bar{p}_{B'_G}(S) - p(S)| \leq \mathcal{O}\left(\beta \sqrt{\frac{\ln(1/\beta)}{n}}\right).$$

(ii) For every  $B'_G \subseteq B_G$ , such that  $|B'_G| \geq (1 - \beta/6)|B_G|$

$$\left| \frac{1}{|B'_G|} \sum_{b \in B'_G} (\bar{\mu}_b(S) - p(S))^2 - \mathbf{v}(p(S')) \right| \leq \mathcal{O}\left(\frac{\beta \ln(1/\beta)}{n}\right).$$

(iii)

$$|\{b \in B_G : |\bar{\mu}_b(S) - p(S)| \geq \mathcal{O}\left(\sqrt{\frac{\ln(1/\beta)}{n}}\right)\}| \leq \mathcal{O}(\beta) \cdot |B_G|.$$

(iv)

$$|\{b \in B_G : |\bar{\mu}_b(S) - p(S)| \geq \mathcal{O}\left(\frac{1}{\sqrt{n}}\right)\}| \leq \mathcal{O}(1) \cdot |B_G|.$$

(v) For every  $B'_G \subseteq B_G$ , such that  $|B'_G| \leq \mathcal{O}(\beta) \cdot |B_G|$

$$\sum_{b \in B'_G} (\bar{\mu}_b(S) - p(S))^2 < \mathcal{O}\left(\beta |B_G| \frac{\ln(1/\beta)}{n}\right),$$

The next lemma shows that these properties hold for a fix subset  $S$ .

**Lemma 26.** For any given subset  $S \in \Sigma$  and for  $|B_G| \geq \mathcal{O}\left(\frac{\log 1/\delta}{\beta^2 \ln(1/\beta)}\right)$ . With probability  $\geq 1 - \delta$ , subset  $S$  has all auxiliary properties (i)–(v). Further, if these auxiliary properties hold for subset  $S$  then subset  $S$  has filtration properties 1–4.

The above Lemma, though not stated explicitly, is implied by Section A.1 and Section A.2 in [JO19]. In particular, the auxiliary properties **(i)** and **(ii)** are implied by Lemma 11, **(iii)** and **(iv)** are implied by Lemma 10, and **(v)** is implied by Lemma 12, and section A.2 therein showed that these auxiliary properties imply filtration properties 1-4. Hence, we use the lemma without proving it again here.

Therefore, to prove Lemma 19, it suffices to show these auxiliary properties for subsets in  $\mathcal{G}$ .

The next Lemma extends the auxiliary properties to all subsets in given a VC class  $\mathcal{G}$ .

**Lemma 27.** *For any given subset family  $\mathcal{G}$  with finite VC dimension and  $|B_G| \geq O(\frac{V_G \log(n/\beta) + \log 1/\delta}{\beta^2})$ . With probability  $\geq 1 - \delta$ , all subsets in  $\mathcal{G}$  has all auxiliary properties **(i)**–**(v)**.*

*Proof.* From Corollary 14, there exist a self  $\epsilon$ -cover  $\mathcal{C}^*$  of  $\mathcal{G}$  under the distribution  $p$  of size  $O(V_G(\frac{\delta\epsilon}{\epsilon})^{V_G})$ . For this section, fix  $\epsilon = O(\frac{\beta^2}{n})$ .

For any  $S \in \mathcal{C}^*$ , for  $|B_G| \geq O(\frac{\log \frac{2|\mathcal{C}^*|}{\delta}}{\beta^2 \ln(1/\beta)}) = O(\frac{V_G \log(n/\beta) + \log 1/\delta}{\beta^2 \ln(1/\beta)})$ , Lemma 26 implies that the auxiliary properties **(i)**–**(v)** with probability  $\geq 1 - \frac{\delta}{2|\mathcal{C}^*|}$ .

Therefore, taking the union bound over the complement, the auxiliary properties **(i)**–**(v)** hold for all subsets in  $\mathcal{C}^*$  with probability  $\geq 1 - \frac{\delta}{2}$ .

Next, we extend these properties for all subsets in  $\mathcal{G}$ .

For subset  $S \in \mathcal{G}$  choose  $S' \in \mathcal{C}^*$  such that  $p(S \Delta S') \leq \epsilon$ . Existence of such a subset  $S' \in \mathcal{C}^*$  is guaranteed for all  $S \in \mathcal{G}$  as  $\mathcal{C}^*$  is an  $\epsilon$ -cover under  $p$ . The properties for  $S'$  holds, since it is a part of the cover  $\mathcal{C}'$ . To extend the auxiliary properties to all subsets in  $\mathcal{G}$ , we show that if the properties hold for  $S'$ , then they also hold for subset  $S$ .

Note that for any subset  $S, S' \in \mathcal{G}$  with  $p(S \Delta S') \leq O(\frac{\beta^2}{n}) = O(\epsilon)$ .

For  $|B_G| \cdot n \geq O(\frac{V_G \log(n/\beta) + \log 1/\delta}{\beta^2} \cdot n)$ , Lemma 24 implies that with probability  $\geq 1 - \delta/2$

$$\bar{p}_{B_G}(S \Delta S') \leq O(\frac{\beta^2}{n}) = O(\epsilon). \quad (7)$$

For any batch  $b \in B$

$$\begin{aligned} \bar{\mu}_b(S) - p(S) &= \left( \bar{\mu}_b(S') + \bar{\mu}_b(S \setminus S') - \bar{\mu}_b(S' \setminus S) \right) - \left( p(S') + p(S \setminus S') - p(S' \setminus S) \right) \\ &= \left( \bar{\mu}_b(S') - p(S') \right) + \left( \bar{\mu}_b(S \setminus S') - \bar{\mu}_b(S' \setminus S) \right) - \left( p(S \setminus S') - p(S' \setminus S) \right). \end{aligned}$$

From the above equation, we get

$$\begin{aligned} \left| \left( \bar{\mu}_b(S) - p(S) \right) - \left( \bar{\mu}_b(S') - p(S') \right) \right| &\leq \bar{\mu}_b(S \setminus S') + \bar{\mu}_b(S' \setminus S) + p(S \setminus S') + p(S' \setminus S) \\ &= \bar{\mu}_b(S \Delta S') + p(S \Delta S') \\ &\leq \bar{\mu}_b(S \Delta S') + O(\epsilon). \end{aligned} \quad (8)$$

Next, we extend property **(i)** to subset  $S$ .

$$\begin{aligned} |\bar{p}_{B'_G}(S) - p(S)| &= \left| \frac{1}{|B'_G|} \sum_{b \in B'_G} \bar{\mu}_b(S) - p(S) \right| = \left| \frac{1}{|B'_G|} \sum_{b \in B'_G} \left( \bar{\mu}_b(S) - p(S) \right) \right| \\ &\stackrel{(a)}{\leq} \left| \frac{1}{|B'_G|} \sum_{b \in B'_G} \left( \bar{\mu}_b(S') - p(S') \right) \right| + \left| \frac{1}{|B'_G|} \sum_{b \in B'_G} \left( \bar{\mu}_b(S \Delta S') + O(\epsilon) \right) \right| \\ &\leq \left| \frac{1}{|B'_G|} \sum_{b \in B'_G} \bar{\mu}_b(S') - p(S') \right| + \left| \frac{1}{|B'_G|} \sum_{b \in B'_G} \bar{\mu}_b(S \Delta S') \right| + O(\epsilon) \\ &\leq |\bar{p}_{B'_G}(S') - p(S')| + \frac{|B_G|}{|B'_G|} \bar{p}_{B_G}(S \Delta S') + O(\epsilon) \\ &\stackrel{(b)}{\leq} O\left( \beta \sqrt{\frac{\ln(1/\beta)}{n}} \right) + \frac{1}{(1 - \beta/6)} \cdot O(\epsilon) + O(\epsilon) \end{aligned}$$

$$\leq \mathcal{O}\left(\beta\sqrt{\frac{\ln(1/\beta)}{n}}\right),$$

here (a) uses (8) and (b) uses that the property (i) holds for  $S'$ .

Next, we extend property (i) to subset  $S$ . From equation (8) we get

$$\begin{aligned} (\bar{\mu}_b(S) - p(S))^2 &\leq \left(|\bar{\mu}_b(S') - p(S')| + (\bar{\mu}_b(S\Delta S') + \mathcal{O}(\epsilon))\right)^2 \\ &= (\bar{\mu}_b(S') - p(S'))^2 + 2|\bar{\mu}_b(S') - p(S')|(\bar{\mu}_b(S\Delta S') + \mathcal{O}(\epsilon)) + (\bar{\mu}_b(S\Delta S') + \mathcal{O}(\epsilon))^2. \end{aligned}$$

Therefore,

$$\begin{aligned} &\sum_{b \in B'_G} (\bar{\mu}_b(S) - p(S))^2 - \sum_{b \in B'_G} (\bar{\mu}_b(S') - p(S'))^2 \\ &\leq \sum_{b \in B'_G} 2|\bar{\mu}_b(S') - p(S')|(\bar{\mu}_b(S\Delta S') + \mathcal{O}(\epsilon)) + \sum_{b \in B'_G} (\bar{\mu}_b(S\Delta S') + \mathcal{O}(\epsilon))^2 \\ &\leq 2\sqrt{\sum_{b \in B'_G} (\bar{\mu}_b(S') - p(S'))^2} \sqrt{\sum_{b \in B'_G} (\bar{\mu}_b(S\Delta S') + \mathcal{O}(\epsilon))^2} + \sum_{b \in B'_G} (\bar{\mu}_b(S\Delta S') + \mathcal{O}(\epsilon))^2, \end{aligned}$$

here the last inequality follows from Cauchy-Schwarz inequality. Next, we bound the last terms in the above expression.

$$\begin{aligned} \sum_{b \in B'_G} (\bar{\mu}_b(S\Delta S') + \mathcal{O}(\epsilon))^2 &\leq \sum_{b \in B'_G} (\bar{\mu}_b(S\Delta S') + \mathcal{O}(\epsilon))(1 + \mathcal{O}(\epsilon)) \\ &\leq 2 \cdot \sum_{b \in B'_G} (\bar{\mu}_b(S\Delta S') + \mathcal{O}(\epsilon)) \\ &\leq 2 \cdot \left(|B'_G|\mathcal{O}(\epsilon) + \sum_{b \in B_G} (\bar{\mu}_b(S\Delta S'))\right) \\ &\leq 2|B'_G| \left(\mathcal{O}(\epsilon) + \frac{|B_G|}{|B'_G|} \bar{p}_{B_G}(S\Delta S')\right) \\ &\leq |B'_G|\mathcal{O}(\epsilon). \end{aligned}$$

Also, from the property (ii) for  $S'$  implies

$$\begin{aligned} \sum_{b \in B'_G} (\bar{\mu}_b(S') - p(S'))^2 &\leq |B'_G|V(p(S')) + |B'_G|\mathcal{O}\left(\frac{\beta \ln(\frac{1}{\beta})}{n}\right) \\ &\leq |B'_G|\mathcal{O}\left(\frac{1}{n}\right), \end{aligned}$$

here we used equation (3), that implies  $V(\cdot) \leq 1/4n$ , and  $\beta \ln(1/\beta) = \mathcal{O}(1)$ . Combining the above three equations we get

$$\begin{aligned} &\sum_{b \in B'_G} (\bar{\mu}_b(S) - p(S))^2 - \sum_{b \in B'_G} (\bar{\mu}_b(S') - p(S'))^2 \\ &\leq 2\sqrt{|B'_G|\mathcal{O}\left(\frac{1}{n}\right)} \sqrt{|B'_G|\mathcal{O}(\epsilon) + |B'_G|\mathcal{O}(\epsilon)} + |B'_G|\mathcal{O}\left(\sqrt{\frac{\epsilon}{n}}\right). \end{aligned}$$

Similarly, one can prove the other direction

$$\sum_{b \in B'_G} (\bar{\mu}_b(S') - p(S'))^2 - \sum_{b \in B'_G} (\bar{\mu}_b(S) - p(S))^2 < |B'_G|\mathcal{O}\left(\sqrt{\frac{\epsilon}{n}}\right).$$

Combining the two equations gives

$$\left| \sum_{b \in B'_G} (\bar{\mu}_b(S) - p(S))^2 - \sum_{b \in B'_G} (\bar{\mu}_b(S') - p(S'))^2 \right| < |B'_G|\mathcal{O}\left(\sqrt{\frac{\epsilon}{n}}\right).$$

And from equation (3) we get

$$|\mathbf{V}(p(S)) - \mathbf{V}(p(S'))| \leq \frac{|p(S) - p(S')|}{n} \leq \frac{|p(S \Delta S')|}{n} \leq \mathcal{O}\left(\frac{\epsilon}{n}\right).$$

Combining the above two equations we get

$$\begin{aligned} & \left| \frac{1}{|B'_G|} \sum_{b \in B'_G} (\bar{\mu}_b(S) - p(S))^2 - \mathbf{V}(p(S)) \right| \\ & \leq \left| \frac{1}{|B'_G|} \sum_{b \in B'_G} (\bar{\mu}_b(S') - p(S'))^2 - \mathbf{V}(p(S')) \right| + \mathcal{O}\left(\sqrt{\frac{\epsilon}{n}}\right) + \mathcal{O}\left(\frac{\epsilon}{n}\right) \\ & \stackrel{(a)}{\leq} \mathcal{O}\left(\frac{\beta \ln(\frac{1}{\beta})}{n}\right) + \mathcal{O}\left(\sqrt{\frac{\epsilon}{n}}\right) + \mathcal{O}\left(\frac{\epsilon}{n}\right) \\ & \stackrel{(b)}{\leq} \mathcal{O}\left(\frac{\beta \ln(\frac{1}{\beta})}{n}\right), \end{aligned} \tag{9}$$

here inequality (a) uses that the property (ii) holds for  $S'$ , (b) uses  $\epsilon = \mathcal{O}\left(\frac{\beta^2}{n}\right)$ .

This completes the proof of the extension of property (ii) to subset  $S$  and in a similar fashion property (v) can be extended.

Next, we extend property (iii) to subset  $S$ .

Note that

$$\begin{aligned} & |\{b \in B_G : |\bar{\mu}_b(S) - p(S)| \geq t\}| \\ & \stackrel{(a)}{\leq} |\{b \in B_G : |\bar{\mu}_b(S') - p(S')| + \bar{\mu}_b(S \Delta S') + \mathcal{O}(\epsilon) \geq t\}| \\ & \leq |\{b \in B_G : |\bar{\mu}_b(S') - p(S')| \geq \frac{2}{3} \cdot t\}| + |\{b \in B_G : \bar{\mu}_b(S \Delta S') \geq \frac{t}{3} - \mathcal{O}(\epsilon)\}| \\ & \leq |\{b \in B_G : |\bar{\mu}_b(S') - p(S')| \geq \frac{2}{3} \cdot t\}| + \frac{\sum_{b \in B_G} \bar{\mu}_b(S \Delta S')}{\frac{t}{3} - \mathcal{O}(\epsilon)} \\ & \leq |\{b \in B_G : |\bar{\mu}_b(S') - p(S')| \geq \frac{2}{3} \cdot t\}| + |B_G| \frac{\bar{p}_{B_G}(S \Delta S')}{\frac{t}{3} - \mathcal{O}(\epsilon)} \\ & \leq |\{b \in B_G : |\bar{\mu}_b(S') - p(S')| \geq \frac{2}{3} \cdot t\}| + |B_G| \frac{\mathcal{O}(\epsilon)}{\frac{t}{3} - \mathcal{O}(\epsilon)}. \end{aligned}$$

here inequality (a) uses (8).

Choosing  $t = \mathcal{O}\left(\sqrt{\frac{\ln(1/\beta)}{n}}\right)$  in the above equation and putting  $\epsilon = \mathcal{O}(\beta^2/n)$  gives

$$\begin{aligned} & |\{b \in B_G : |\bar{\mu}_b(S) - p(S)| \geq \mathcal{O}\left(\sqrt{\frac{\ln(1/\beta)}{n}}\right)\}| \\ & \leq |\{b \in B_G : |\bar{\mu}_b(S') - p(S')| \geq \mathcal{O}\left(\sqrt{\frac{\ln(1/\beta)}{n}}\right)\}| + |B_G| \frac{\mathcal{O}(\beta^2/n)}{\mathcal{O}\left(\sqrt{\ln(1/\beta)/n}\right) - \mathcal{O}(\beta^2/n)} \\ & \leq \mathcal{O}(\beta) |B_G|. \end{aligned} \tag{10}$$

here the last step uses property (ii) for  $S'$ . This extends property (iii) to subset  $S$ . Property (iv) can be extended similarly.  $\blacksquare$

*Proof of Lemma 19.* The previous lemma showed that the auxiliary properties hold for all subsets in  $\mathcal{G}$ . Lemma 26 showed that these auxiliary properties implies the filtration properties. Combining the two Lemmas completes the proof of Lemma 19.

## E Remaining proofs

### E.1 Proof of Theorem 5

To prove the above theorem we use the following result.

**Theorem 28** ([ADLS17]). *There is an algorithm which, given any  $t$  samples  $x_1, x_2, \dots, x_s \in \mathbb{R}$ , returns an  $t$ -piecewise degree- $d$  polynomial  $p'$  which minimizes  $\|p' - \bar{p}_s\|_{\mathcal{F}_{2td}}$  distance between  $p'$  and the empirical distribution  $\bar{p}_s$ , to within additive error  $\gamma$  in time  $\text{poly}(s, t, d, 1/\gamma)$ .*

We note that the  $t$ -piecewise degree- $d$  polynomial  $p'$  returned in the above theorem may not always integrate to 1 and is only an approximate Yatracos minimizer, and hence we can not directly use equation (1).

But there is a simple generalization of this equation in [DL01], which applies even when  $p'$  returned in the above theorem doesn't integrate to 1 and is only an approximate Yatracos minimizer.

Recall that  $\mathcal{Y}(\mathcal{P})$  is Yatracos class of  $\mathcal{P}$ . Let  $p' \in \mathcal{P}$  be such that  $\|p' - \bar{p}\|_{\mathcal{Y}(\mathcal{P})} = \min_{q \in \mathcal{P}} \|q - \bar{p}\|_{\mathcal{Y}(\mathcal{P})} + \gamma$ . Then [DL01] (exercise 6.2) implies that

$$\|p - p'\|_{TV} \leq 5 \cdot \text{opt}_{\mathcal{P}}(p) + 4\|p - \bar{p}\|_{\mathcal{Y}(\mathcal{P})} + 5\gamma.$$

Recall that Yatracos class of  $t$ -piecewise degree  $d$  polynomials, (including those that don't integrate to 1), is  $\mathcal{F}_{2td}$ .

Theorem 2 provides a polynomial time algorithm that returns a sub-collection  $B^* \subseteq B$  of batches whose empirical distribution  $\bar{p}_{B^*}$  is close to  $p$  in  $\mathcal{F}_{2td}$ -distance. Then running the algorithm in Theorem 28 for samples in  $\bar{p}_{B^*}$  returns a  $t$ -piecewise degree- $d$  polynomial  $p^*$ . Then the above equation implies that  $p^*$  approximates  $p$  in TV distance, to complete the proof of the theorem.

### E.2 Proof of Lemma 6

*Proof.* For two distributions  $p$  and  $q$  over  $\Omega \times \{0, 1\}$ , the largest difference between the loss of any classifier  $h \in \mathcal{H}$  is related to their  $\mathcal{F}_{\mathcal{H}}$ -distance,

$$\begin{aligned} \sup_{h \in \mathcal{H}} |r_p(h) - r_q(h)| &= \sup_{h \in \mathcal{H}} |\Pr_{(X,Y) \sim p}[h(X) \neq Y] - \Pr_{(X,Y) \sim q}[h(X) \neq Y]| \\ &\leq \sup_{h \in \mathcal{H}} \sum_{y \in \{0,1\}} |\Pr_{(X,Y) \sim p}(h(X) = \bar{y}, Y = y) - \Pr_{(X,Y) \sim q}(h(X) = \bar{y}, Y = y)| \\ &\leq 2\|p - q\|_{\mathcal{F}_{\mathcal{H}}}. \end{aligned} \tag{11}$$

Then,

$$\begin{aligned} &r_p(h^{\text{opt}}(q)) - r_p^{\text{opt}}(\mathcal{H}) \\ &= r_p(h^{\text{opt}}(q)) - r_p(h^{\text{opt}}(p)) \\ &= r_p(h^{\text{opt}}(q)) - r_q(h^{\text{opt}}(q)) + r_q(h^{\text{opt}}(q)) - r_q(h^{\text{opt}}(p)) + r_q(h^{\text{opt}}(p)) - r_p(h^{\text{opt}}(p)) \\ &\leq r_q(h^{\text{opt}}(q)) - r_q(h^{\text{opt}}(p)) + 2 \sup_{h \in \mathcal{H}} |r_q(h) - r_p(h)| \\ &\leq 2 \sup_{h \in \mathcal{H}} |r_q(h) - r_p(h)| \\ &\leq 4\|p - q\|_{\mathcal{F}_{\mathcal{H}}}, \end{aligned}$$

here the last inequality uses (11). ■

### E.3 Proof of Theorem 8

*Proof.* Let  $\mathcal{H} : \Omega \rightarrow \{0, 1\}$  of Boolean functions with VC dimension  $\mathcal{V}_{\mathcal{H}} \geq 1$ . And let  $(X, Y) \sim p$ , where  $X \in \Omega$  and  $Y \in \{0, 1\}$ .

Since  $\mathcal{V}_{\mathcal{H}} \geq 1$ , then there is at-least one  $\omega^* \in \Omega$  and  $h_1, h_2 \in \mathcal{H}$ , s.t.  $h_1(\omega^*) \neq h_2(\omega^*)$ , w.l.o.g., let  $h_1(\omega^*) = 1$  and  $h_2(\omega^*) = 0$ .

Next, we define two distributions  $p_1$  and  $p_2$ . Let  $\gamma = c\frac{\beta}{\sqrt{n}}$ , for some small enough constant  $c > 0$  to be chosen later. Let  $p_1(\omega^*, 1) = p_2(\omega^*, 0) = \frac{1}{2} + \gamma$ , and  $p_1(\omega^*, 0) = p_2(\omega^*, 1) = \frac{1}{2} - \gamma$ . Both  $p_1$  and  $p_2$  assigns zero probability to all other points in  $\Omega \times \{0, 1\}$ .

It is easy to see that, for distribution  $p_1$ , hypothesis  $h_1$  achieves the optimal loss  $\frac{1}{2} - \gamma$  and similarly for distribution  $p_2$ , hypothesis  $h_2$  achieves the optimal loss  $\frac{1}{2} - \gamma$ .

Next, note that for distribution  $p_1$  the loss of any classifier  $f : \Omega \rightarrow \{0, 1\}$  is

$$\Pr_{(X,Y) \sim p_1} (f(\omega^*) \neq Y) = \Pr(f(\omega^*) = 1) \times \left(\frac{1}{2} - \gamma\right) + \Pr(f(\omega^*) = 0) \times \left(\frac{1}{2} + \gamma\right).$$

Similarly its loss for distribution  $p_2$  is

$$\Pr_{(X,Y) \sim p_2} (f(\omega^*) \neq Y) = \Pr(f(\omega^*) = 1) \times \left(\frac{1}{2} + \gamma\right) + \Pr(f(\omega^*) = 0) \times \left(\frac{1}{2} - \gamma\right).$$

Adding the two losses we get

$$\Pr_{(X,Y) \sim p_1} (f(\omega^*) \neq Y) + \Pr_{(X,Y) \sim p_2} (f(\omega^*) \neq Y) = 1$$

Therefore, every classifier incurs a loss of  $\geq 1/2$  for at least one of the two distributions. Since the optimal loss for both distributions is  $1/2 - \gamma$ , any classifier incurs an excess loss of  $\gamma$  for at least one of the distributions among  $p_1$  and  $p_2$ .

The distribution  $p$  of the data  $(X, Y)$ , is chosen to be one of the two distributions  $p_1$  and  $p_2$  each with probability  $1/2$ . Then we show that depending on which distribution is chosen as  $p$ , the adversary can choose its batches such that, even with infinitely many batches, the two distributions are indistinguishable. Therefore, any classifier incurs an excess loss of  $\gamma$  with probability  $\geq 1/2$ .

Note that for every batch, the number of  $Y = 1$ 's is a sufficient statistic for determining whether  $p$  is  $p_1$  or  $p_2$ , and it is distributed either  $B(n, \frac{1}{2} + \gamma)$  or  $B(n, \frac{1}{2} - \gamma)$ . From equation 2.15 in [AJ06], for any  $c < 1/12$  and  $\gamma = c\beta/\sqrt{n}$ , the total variation distance between  $B(n, \frac{1}{2} + \gamma)$  or  $B(n, \frac{1}{2} - \gamma)$  is  $\leq 2\beta$ .

Therefore, the adversary can choose distributions  $q_1$  and  $q_2$ , over the number of  $Y = 1$ 's in the adversarial batches, such that

$$(1 - \beta)B(n, \frac{1}{2} + \gamma) + \beta q_1 = (1 - \beta)B(n, \frac{1}{2} - \gamma) + \beta q_2.$$

Hence, if the good batches are distributed as  $B(n, \frac{1}{2} + \gamma)$  then adversary chooses  $q_1$  as distribution of the adversarial batches and if good batches are distributed as  $B(n, \frac{1}{2} - \gamma)$  then adversary chooses  $q_2$  and in both the cases the resultant joint distribution of all the batches is same. Hence the two cases are indistinguishable. ■

The theorem implies that even with access to infinitely many batches, even for the simplest of the hypothesis class, no algorithm can avoid an excess loss  $\Omega(\beta/\sqrt{n})$  with probability  $1/2$ .

#### E.4 Proof of Theorem 9

*Proof.* To prove the theorem, we show how to use algorithm in Theorem 2 that gives "cleaner" batches for  $\mathcal{F}_k$ -distance, to get "cleaner" batches for  $\mathcal{F}_{\mathcal{H}_k}$ -distance.

Recall that

$$\mathcal{F}_{\mathcal{H}_k} = \{(\{x \in \mathbb{R} : h(x) = y\}, \bar{y}) : h \in \mathcal{H}_k, y \in \{0, 1\}\}.$$

First divide the collection of sets  $\mathcal{F}_{\mathcal{H}_k}$  into two parts:  $\mathcal{F}_{\mathcal{H}_k}^0 := \{(\{x \in \mathbb{R} : h(x) = 0\}, 1) : h \in \mathcal{H}_k\}$  and  $\mathcal{F}_{\mathcal{H}_k}^1 := \{(\{x \in \mathbb{R} : h(x) = 1\}, 0) : h \in \mathcal{H}_k\}$ . Note that  $\mathcal{F}_{\mathcal{H}_k} = \mathcal{F}_{\mathcal{H}_k}^0 \cup \mathcal{F}_{\mathcal{H}_k}^1$ . Then, from the definition of  $\mathcal{F}$  distance, it follows

$$\|p - q\|_{\mathcal{F}_{\mathcal{H}_k}} = \max\{\|p - q\|_{\mathcal{F}_{\mathcal{H}_k}^0}, \|p - q\|_{\mathcal{F}_{\mathcal{H}_k}^1}\}$$

Hence, it suffices to estimate  $p$  in both  $\mathcal{F}_{\mathcal{H}_k}^0$  and  $\mathcal{F}_{\mathcal{H}_k}^1$  distances.

Since decision regions for each hypothesis  $h \in \mathcal{H}_k$ , consists of at most  $k$ -intervals, these collections can be rewritten as  $\mathcal{F}_{\mathcal{H}_k}^0 := \{(S, 0) : S \in \mathcal{F}_k\}$  and  $\mathcal{F}_{\mathcal{H}_k}^1 := \{(S, 1) : S \in \mathcal{F}_k\}$ .

To learn in  $\mathcal{F}_{\mathcal{H}_k}^0$  distance, w.l.o.g., we can remap all points of the form  $(x, 1)$  to  $(\infty, 0)$ . Then this problem is identical to learning in  $\mathcal{F}_k$  distance as  $y = 0$  is the same for all samples after remapping. Similarly to learn in  $\mathcal{F}_{\mathcal{H}_k}^1$  distance we remap all points of the form  $(x, 0)$  to  $(\infty, 1)$ .

Then use the algorithm in Theorem 2 to first remove the adversarial batches for  $\mathcal{F}_{\mathcal{H}_k}^0$  distance, and then for the remaining batches again use the same algorithm to remove adversarial batches for  $\mathcal{F}_{\mathcal{H}_k}^1$  distance. The empirical distribution  $\bar{p}_{B^*}$  of the batches  $B^* \subseteq B$  remaining in the end, approximates  $p$  in both  $\mathcal{F}_{\mathcal{H}_k}^0$  and  $\mathcal{F}_{\mathcal{H}_k}^1$  distances to an accuracy  $\mathcal{O}(\Delta)$ . Therefore, it estimates  $p$  in  $\mathcal{F}_{\mathcal{H}_k}$  distance to the same accuracy.

Then use the polynomial-time algorithm [Maa94] to find the empirical risk minimizer  $h \in \mathcal{H}_k$  for empirical distribution  $\bar{p}_{B^*}$ . Then Lemma 6 implies that the optimal classifier  $h^{\text{opt}}(\bar{p}_{B^*})$  for the empirical distribution  $\bar{p}_{B^*}$ , of the cleaner batch collection  $B^*$ , will have a small-excess-classification-loss  $\mathcal{O}(\Delta)$  for  $p$ . This completes the proof of the theorem. ■
